# Supplementary material
Source: bioRxiv or medRxiv preprint supplement (https://www.biorxiv.org/highwire/filestream/125810/field_highwire_adjunct_files/0/416693-1.pdf)
Supplement: Supplementary file [file 416693-1.pdf]

## SUPPORTING INFORMATION

**Table S1.** Population information for *C. solstitialis* used in this study, including population abbreviations, county (USA) or country of origin, latitude and longitude, number of individuals sampled, estimated date of first record for each population based on collections from the Jepson Herbarium, and population age at time of collection in 2008 for invading populations. Effective population size ( $N_e$ ) estimates are given based on the full dataset without subsampling (622 loci), the median across 30,000 subsamples, and the rarified  $N_e$  index standardized to its value at 10 individuals.

| Invading Populations |              |           |            |                     |              |                   |                          |     |
|----------------------|--------------|-----------|------------|---------------------|--------------|-------------------|--------------------------|-----|
| Population           | County       | Latitude  | Longitude  | Individuals Sampled | Median $N_e$ | $N_e$ Index Value | Date of First Collection | Age |
| CLV                  | Madera       | 36.9163   | -119.79349 | 21                  | 28.5         | 18.01587          | 1963                     | 53  |
| DIA                  | Contra Costa | 37.86526  | -121.97785 | 18                  | 33.9         | 18.78175          | 1934                     | 82  |
| GIL                  | Santa Clara  | 37.03373  | -121.53674 | 20                  | 33.4         | 18.90542          | 1935                     | 81  |
| LEB                  | Kern         | 34.82736  | -118.87097 | 19                  | 24.1         | 16.90731          | 1947                     | 69  |
| MAR                  | Marin        | 38.019    | -122.6058  | 15                  | 21           | 17.37218          | 1892                     | 124 |
| ORO                  | Butte        | 39.49398  | -121.68788 | 17                  | 28.1         | 18.55231          | 1932                     | 84  |
| RB                   | Tehama       | 40.27083  | -122.27104 | 20                  | 38.5         | 19.54413          | 1909                     | 107 |
| SIE                  | El Dorado    | 38.781617 | -120.41639 | 18                  | 20           | 16.48769          | 1972                     | 44  |
| TRI                  | Mariposa     | 37.46178  | -119.79218 | 16                  | 19.5         | 16.81183          | 1997                     | 19  |
| UKI                  | Mendocino    | 39.16363  | -123.22705 | 14                  | 20           | 16.46251          | 1921                     | 95  |
| VET                  | Calaveras    | 38.09996  | -120.58947 | 16                  | 29.7         | 19.48889          | 1936                     | 80  |
| Yre                  | Siskiyou     | 41.69161  | -122.63988 | 18                  | 34.3         | 19.69115          | 1962                     | 54  |
| Native Populations   |              |           |            |                     |              |                   |                          |     |
| Population           | Country      | Latitude  | Longitude  | Individuals Sampled | Median $N_e$ | $N_e$ Index Value |                          |     |
| BU24                 | Bulgaria     | 43.382222 | 28.457667  | 16                  | 29.3         | 19.00644          |                          |     |
| CAN                  | Spain        | 41.00033  | -4.89718   | 19                  | 23.9         | 17.28559          |                          |     |
| CAZ                  | France       | 43.74842  | 3.77061    | 20                  | 42.7         | 20.43995          |                          |     |
| CUE                  | Spain        | 40.12946  | -2.1395    | 15                  | 16.2         | 15.79074          |                          |     |
| Ro25                 | Romania      | 44.124733 | 28.634183  | 19                  | 30.9         | 18.65582          |                          |     |
| SAL                  | Spain        | 40.99003  | -5.65856   | 20                  | 22.9         | 16.89143          |                          |     |
| TK23                 | Turkey       | 41.751233 | 27.247883  | 18                  | 31.8         | 18.87271          |                          |     |

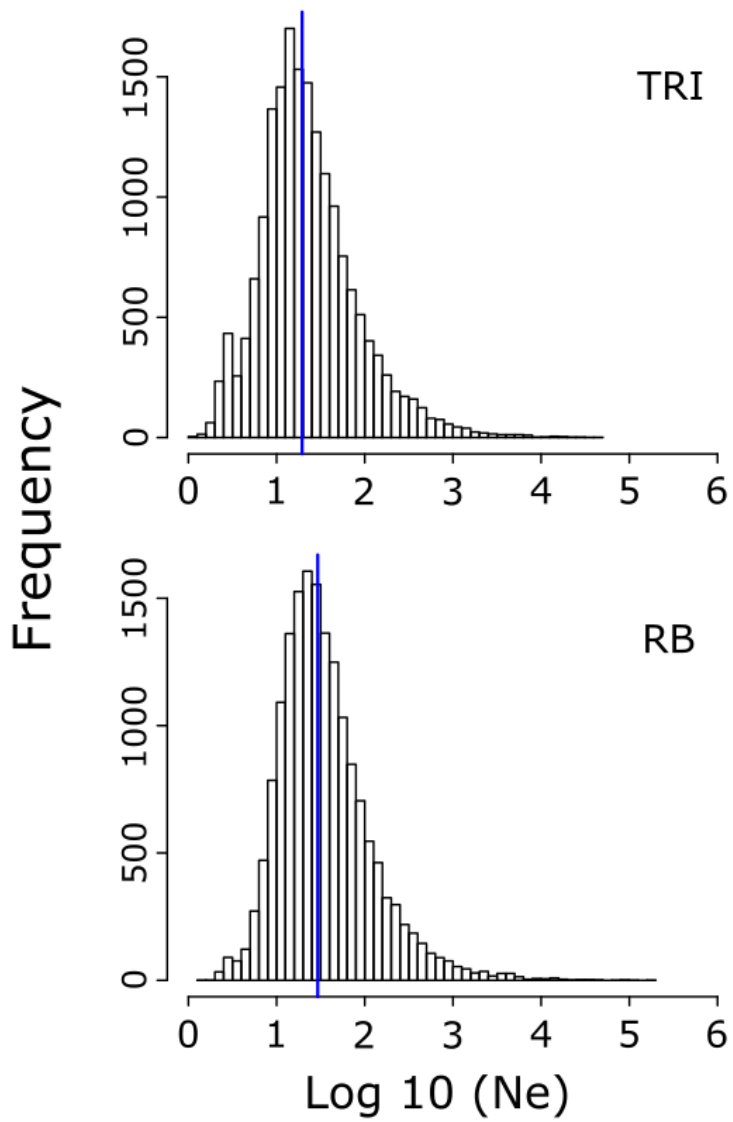

**Fig S1.** Histograms of  $\log_{10}$  transformed  $N_e$  estimated with 20 subsampled SNP loci and 16 individuals for two invading *C. solstitialis* populations. Vertical blue lines indicate median values. Negative and infinite estimates of  $N_e$  were removed from all analyses.

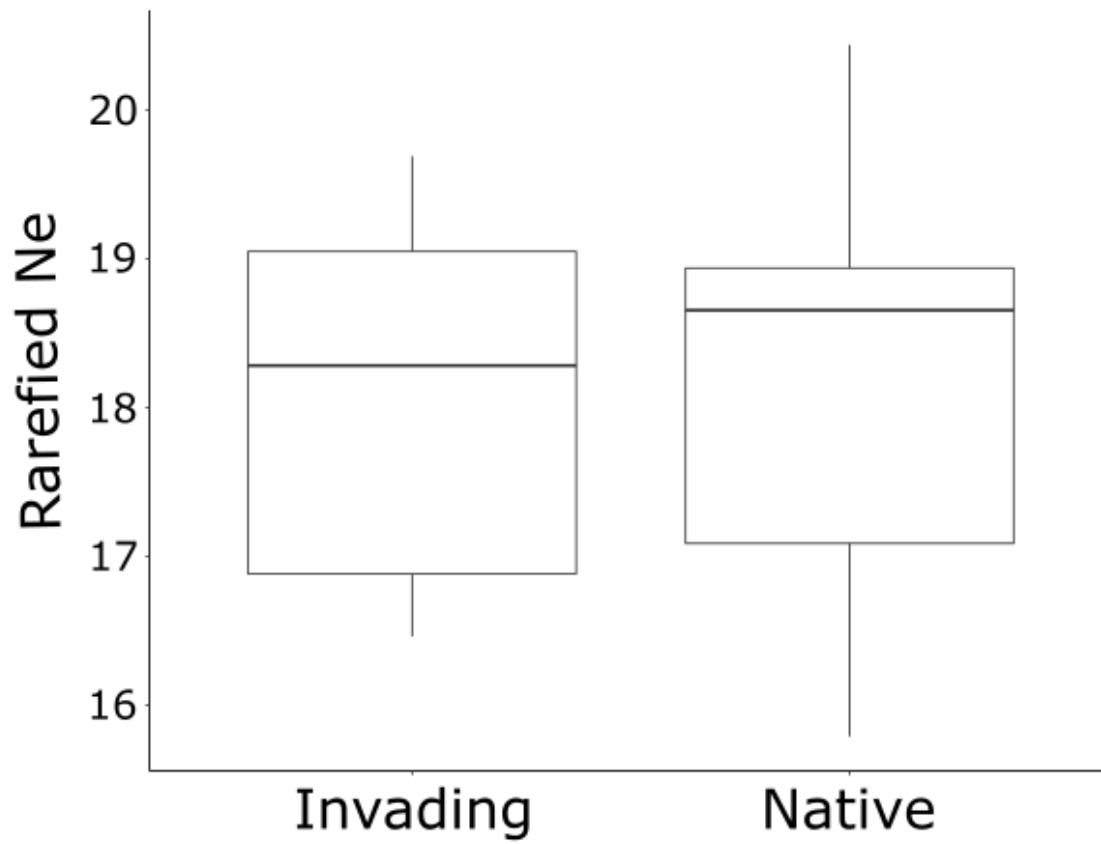

**Fig S2.** Distributions of rarefied  $N_e$  for native European (N=7) and invading Californian (N=12) populations of *C. solstitialis*.

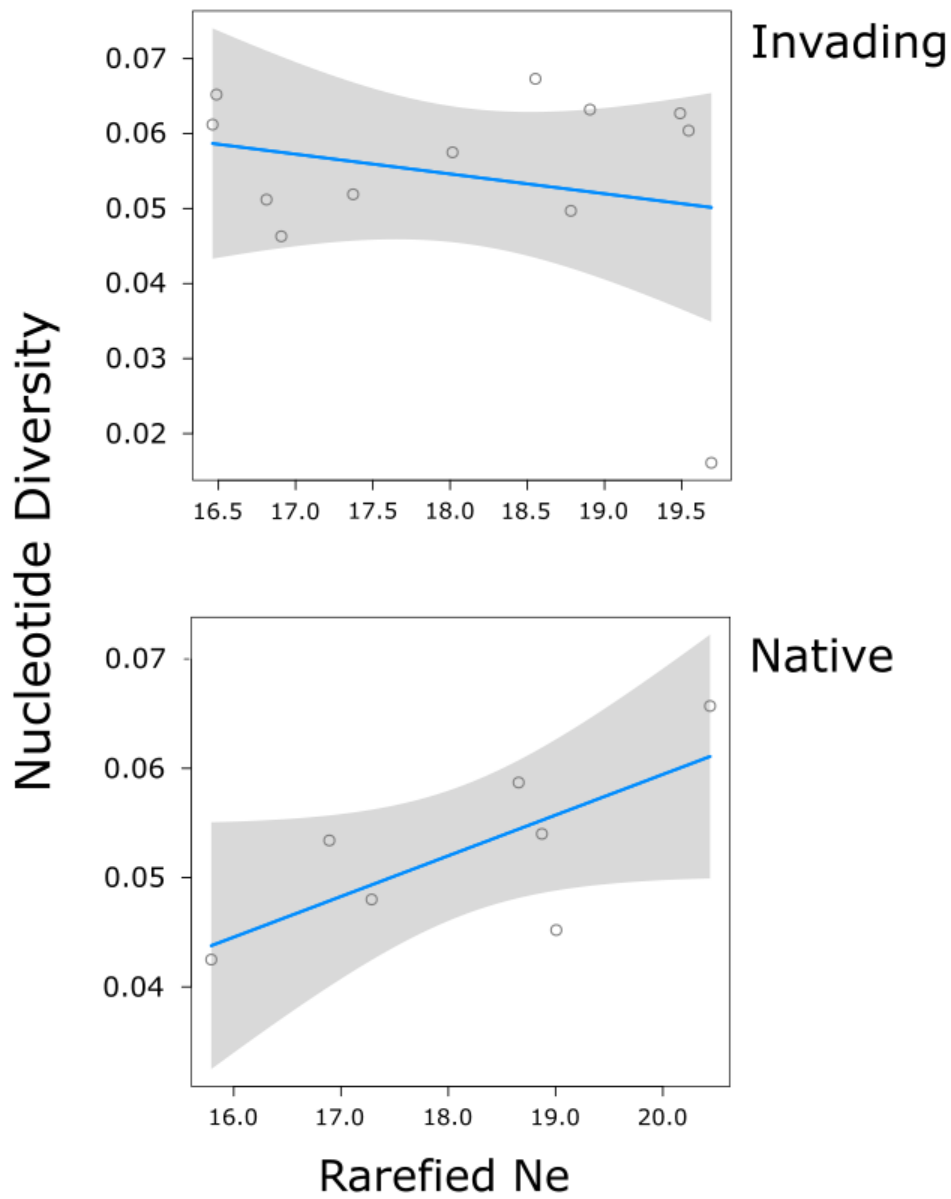

**Fig S3.** The relationship between rarefied  $N_e$  and nucleotide diversity ( $\pi$ ) in native and invading populations of *C. solstitialis*. There is no significant relationship between  $\pi$  and  $N_e$  for native populations (top). In the native range,  $\pi$  has a marginally significant relationship with rarefied  $N_e$  (bottom). Shading represent 95% confidence intervals.
